# Supplementary material for: Cancer Awareness Measure (CAM) and Cancer Awareness Measure MYthical Causes Scale (CAM-MY) scores in Pakistani population
Source: Springer Nature journal article supplement (doi:10.1038/s41598-022-13012-8), 2022-05-25
Supplement: MOESM2 [file 41598_2022_13012_MOESM2_ESM.pdf]

| <b>Supplementary Table 1: Average scores for CAM items.</b> |        |        |         |      |            |                      |                    |         |                 |         |                |
|-------------------------------------------------------------|--------|--------|---------|------|------------|----------------------|--------------------|---------|-----------------|---------|----------------|
|                                                             | Low FV | Low PA | Old Age | HPV  | Overweight | Relative with Cancer | Red Processed Meat | Sunburn | Passive Smoking | Alcohol | Active Smoking |
| Strongly Disagree                                           | 4.1    | 5.9    | 8.2     | 5.5  | 9.6        | 9.1                  | 6.1                | 12.7    | 22              | 27.9    | 47.9           |
| Disagree                                                    | 30.2   | 35.4   | 33.7    | 36.9 | 33.1       | 34.8                 | 38.7               | 44.2    | 42.7            | 41.8    | 42.1           |
| Neutral                                                     | 17.4   | 17.1   | 13.7    | 38.3 | 15.2       | 12.2                 | 24.2               | 10.8    | 13.7            | 14      | 2              |
| Agree                                                       | 34.6   | 32.5   | 33.5    | 14.5 | 34.3       | 33.7                 | 25.2               | 23.3    | 16.5            | 12.2    | 4.7            |
| Strongly Agree                                              | 13.7   | 9      | 10.8    | 4.9  | 7.8        | 10.2                 | 5.8                | 9       | 5.2             | 4.1     | 3.4            |

| Supplementary Table 2: Average scores for CAM-MY items. |                                    |                    |                    |             |                          |                    |                      |                  |        |                   |                |          |                         |
|---------------------------------------------------------|------------------------------------|--------------------|--------------------|-------------|--------------------------|--------------------|----------------------|------------------|--------|-------------------|----------------|----------|-------------------------|
|                                                         | Pesticides<br>Fertilizers<br>spray | Microwave<br>Ovens | Plastic<br>bottles | GM<br>Foods | Artificial<br>Sweeteners | Physical<br>Trauma | Cleaning<br>Products | Mobile<br>phones | Stress | EM<br>Frequencies | Power<br>lines | Aerosols | Cancer is<br>Contagious |
| Strongly<br>Agree                                       | 19.7                               | 18.4               | 15.5               | 6.1         | 4.7                      | 9.3                | 5.5                  | 5.6              | 8.1    | 4.7               | 4              | 2.7      | 4.4                     |
| Agree                                                   | 47.4                               | 54                 | 47.3               | 34.5        | 40.4                     | 38.7               | 32.2                 | 35.8             | 32.9   | 34.5              | 27.7           | 22       | 12.7                    |
| Neutral                                                 | 15.9                               | 9                  | 13.3               | 34.5        | 20.4                     | 16.6               | 22.6                 | 18               | 15.5   | 16.9              | 22.7           | 24.1     | 5.6                     |
| Disagree                                                | 14.2                               | 14.3               | 18.8               | 20          | 29.1                     | 28.7               | 32.2                 | 30               | 34.5   | 34.1              | 34.3           | 41.3     | 42.2                    |
| Strongly<br>Disagree                                    | 2.9                                | 4.3                | 5.2                | 5           | 5.2                      | 6.6                | 7.6                  | 10.5             | 8.7    | 9.8               | 11             | 9.9      | 35.1                    |

| <b>Supplementary Table 3: Effects of Formal Years of Education (YoE) on the average score for each CAM question.</b> |                |                 |         |        |                    |            |         |         |                 |          |        |
|----------------------------------------------------------------------------------------------------------------------|----------------|-----------------|---------|--------|--------------------|------------|---------|---------|-----------------|----------|--------|
| YoE                                                                                                                  | Active Smoking | Passive Smoking | Alcohol | Low FV | Red Processed Meat | Overweight | Sunburn | Old Age | Relative Cancer | with HPV | Low PA |
| 10                                                                                                                   | 79.2           | 61.5            | 66.5    | 40     | 54.2               | 52.5       | 47      | 52.8    | 54.5            | 51.2     | 45.2   |
| 12                                                                                                                   | 80.8           | 69.8            | 64      | 43.2   | 51.7               | 47         | 53.2    | 51.2    | 46.5            | 54.5     | 46.8   |
| 14                                                                                                                   | 81.6           | 67.3            | 69.8    | 42.7   | 54.5               | 48.4       | 60.1    | 46      | 49.4            | 54.5     | 51.5   |
| 16                                                                                                                   | 82.9           | 62.5            | 72      | 47.1   | 53.2               | 53.1       | 60      | 48.3    | 49.4            | 59.4     | 49.9   |

| <b>Supplementary Table 4: Effects of Formal Years of Education (YoE) on the average score for each CAM-MY question.</b> |          |                      |                 |          |                 |               |                   |                       |             |        |                 |                |                              |
|-------------------------------------------------------------------------------------------------------------------------|----------|----------------------|-----------------|----------|-----------------|---------------|-------------------|-----------------------|-------------|--------|-----------------|----------------|------------------------------|
| YoE                                                                                                                     | GM Foods | Cancer is Contagious | Microwave Ovens | Aerosols | Plastic bottles | Mobile phones | Cleaning Products | Artificial Sweeteners | Power lines | Stress | Physical Trauma | EM Frequencies | Pesticides Fertilizers spray |
| 10                                                                                                                      | 52.8     | 57.8                 | 38.2            | 61.8     | 43              | 51.8          | 50.5              | 54                    | 58.6        | 50.8   | 41.8            | 51.5           | 34.8                         |
| 12                                                                                                                      | 48.8     | 69.8                 | 29.5            | 61.8     | 36.5            | 53.8          | 48.8              | 49.5                  | 56.2        | 55     | 42.8            | 55             | 36.5                         |
| 14                                                                                                                      | 43.7     | 76.9                 | 32.5            | 58       | 36.9            | 50.1          | 54.3              | 45.7                  | 56.4        | 52.2   | 48.3            | 50             | 31.1                         |
| 16                                                                                                                      | 43.7     | 76.5                 | 32.7            | 56.1     | 36.7            | 50.3          | 49.6              | 45.4                  | 52.4        | 47.7   | 47.4            | 53.7           | 33.3                         |
